# Supplementary material
Source: PubMed Central journal article supplement (PMC4978378)
Supplement: supp_jiw249_jiw249supp.pdf [file supp_jiw249_jiw249supp.pdf]

**Supplemental information:**

**$\beta$ -glucans are Masked but Contribute to Pulmonary  
Inflammation During *Pneumocystis* Pneumonia**

Geetha Kutty<sup>1</sup>, A. Sally Davis<sup>2</sup>, Gabriela A. Ferreyra<sup>1</sup>, Ju Qiu<sup>3</sup>, Da Wei Huang<sup>3</sup>,  
Monica Sassi<sup>1</sup>, Lisa Bishop<sup>1</sup>, Grace Handley<sup>1</sup>, Brad Sherman<sup>3</sup>, Richard Lempicki<sup>3</sup>,  
and Joseph A. Kovacs<sup>1</sup>

<sup>1</sup>Critical Care Medicine Department, NIH Clinical Center, National Institutes of Health, Bethesda, Maryland. <sup>2</sup>Diagnostic Medicine/Pathobiology, Kansas State University College of Veterinary Medicine, Manhattan, KS 66506, USA. <sup>3</sup>Laboratory of Immunopathogenesis and Bioinformatics, Leidos Biomedical Research, Inc., Frederick National Laboratory for Cancer Research, Frederick, MD 21702, USA

## Supplemental Methods

**Microarray hybridization and analysis.** Total RNA was isolated from lung tissues using RNeasy Mini kit (QIAGEN) following the manufacturer's instructions. RNA quality was evaluated using RNA 6000 Nano LabChip (Agilent 2100 Bioanalyzer, Santa Clara, CA). Double stranded cDNA was synthesized from 150 ng of total RNA, which was then transcribed in vitro to make cRNA followed by sense strand cDNA synthesis using WT Expression Kit (Ambion). cDNA was fragmented, labeled using Affymetrix GeneChip WT Terminal Labeling Kit. Labeled cDNA was hybridized for 18 hours to the GeneChip Mouse Gene 1.0 ST arrays (Affymetrix, Santa Clara, CA) following the manufacturer's directions. Arrays were stained and washed in the Affymetrix Fluidics Station 400 and scanned (Affymetrix 7G).

**Immunohistochemical staining.** *P. murina*-infected and uninfected lung tissue sections were labeled for macrophages with rat anti-mouse F4/80 (Clone:A3-1) monoclonal antibody (AbD Serotec; Raleigh, NC) using a modified avidin-biotin complex immunohistochemistry technique. Briefly, 5  $\mu$ m thick, HistoChoice fixed, paraffin-embedded tissue sections were deparaffinized, rehydrated, avidin and biotin blocked with the Avidin/Biotin Blocking Kit (Vector Labs; Burlingame, California), and protein blocked with X0909 (Dako; Carpinteria, CA); the primary antibody was applied at 1:50 dilution in diluent S0809 (Dako), detected with Biotin-SP AffiniPure Rabbit Anti-Rat IgG (Jackson ImmunoResearch; West Grove, PA), and visualized with VECTASTAIN ABC Kit (Rabbit IgG) and 3,3'-diaminobenzidine (Vector Labs) counterstained with Mayer's hematoxylin. Three lungs from mice with *P. murina* infection that were treated with

caspofungin, 10 mg/kg, for 21 days, three lungs from untreated mice with *P. murina* infection (all from experiment 6) and two lungs from uninfected control mice were labeled with F4/80 in one run. For each lung, the number of F4/80-labeled macrophages in ten random high power fields (400X), excluding areas with large airways, were manually counted and averaged.

Table S1. Summary of experiments with caspofungin treatment of mice with *Pneumocystis pneumonia*.

| Experiment and Group | Caspofungin dose   | N | Organism load, log <sub>10</sub> /mg tissue |
|----------------------|--------------------|---|---------------------------------------------|
| Experiment 1         |                    |   |                                             |
| Control              | None               | 5 | 5.07                                        |
| Caspofungin          | 30 µg/kg x 3 days  | 5 | 5.04                                        |
| Experiment 2         |                    |   |                                             |
| Control              | None               | 5 | 5.48                                        |
| Caspofungin          | 30 µg/kg x 3 days  | 5 | 5.62                                        |
| Experiment 3         |                    |   |                                             |
| Control              | None               | 3 | 4.85                                        |
| Caspofungin          | 30 µg/kg x 9 days  | 4 | 4.73                                        |
| Experiment 4         |                    |   |                                             |
| Control              | None               | 5 | 5.24                                        |
| Caspofungin          | 30 µg/kg x 3 days  | 5 | 5.22                                        |
| Experiment 5         |                    |   |                                             |
| Control              | None               | 5 | 5.06                                        |
| Caspofungin*         | 10 mg/kg x 9 days  | 4 | 4.80                                        |
| Experiment 6         |                    |   |                                             |
| Control              | None               | 5 | 5.19                                        |
| Caspofungin*         | 10 mg/kg x 21 days | 6 | 3.68 <sup>†</sup>                           |

\* Caspofungin was administered 5 days per week

<sup>†</sup> p < 0.001

Table S2. Probe sets that were differentially expressed in caspofungin-treated mice compared to untreated *Pneumocystis*-infected mice in experiment 3.

| Transcript Cluster ID | Gene Symbol | Fold change, log <sub>2</sub> |
|-----------------------|-------------|-------------------------------|
| 10576235              | Dpep1       | 1.38                          |
| 10344566              |             | 1.30                          |
| 10427436              | C7          | 1.30                          |
| 10549647              | Ncr1        | 1.14                          |
| 10338533              |             | 1.02                          |
| 10340905              |             | 0.98                          |
| 10394534              | Osr1        | 0.93                          |
| 10366586              | Ifng        | 0.91                          |
| 10565994              | Art2b       | 0.91                          |
| 10368240              | Tcf21       | 0.90                          |
| 10421186              | Gm10002     | 0.89                          |
| 10343455              |             | 0.88                          |
| 10552406              | Nkg7        | 0.85                          |
| 10341146              |             | 0.85                          |
| 10412211              | Gzma        | 0.85                          |
| 10395409              | Meox2       | 0.85                          |
| 10390328              | Tbx21       | 0.84                          |
| 10343852              |             | 0.79                          |
| 10433776              | Snai2       | 0.79                          |
| 10344539              |             | 0.79                          |
| 10342423              |             | 0.78                          |
| 10343362              |             | 0.76                          |
| 10340949              |             | 0.76                          |
| 10338694              |             | 0.76                          |
| 10344551              |             | 0.74                          |
| 10343378              |             | 0.73                          |
| 10342663              |             | 0.72                          |
| 10417526              | Dnase1l3    | 0.72                          |
| 10338959              |             | 0.72                          |
| 10414470              | Tlr11       | 0.71                          |
| 10414548              | Rnase6      | 0.70                          |
| 10338660              |             | 0.70                          |
| 10567863              | Cd19        | 0.70                          |
| 10338134              |             | 0.69                          |
| 10390691              | Nr1d1       | 0.69                          |
| 10343684              |             | 0.68                          |
| 10509577              | Pla2g2d     | 0.68                          |
| 10342284              |             | 0.67                          |
| 10475845              | Acox1       | 0.67                          |
| 10584628              | Thy1        | 0.67                          |
| 10341150              |             | 0.66                          |
| 10341684              |             | 0.66                          |
| 10437655              | Nubp1       | 0.66                          |
| 10338826              |             | 0.66                          |
| 10341955              |             | 0.66                          |
| 10342534              |             | 0.65                          |
| 10468898              | Lax1        | 0.64                          |

| Transcript Cluster ID | Gene Symbol   | Fold change, log <sub>2</sub> |
|-----------------------|---------------|-------------------------------|
| 10343311              |               | 0.64                          |
| 10343490              |               | 0.64                          |
| 10465059              | Ctsw          | 0.64                          |
| 10343187              |               | 0.63                          |
| 10342431              |               | 0.63                          |
| 10478884              | Snai1         | 0.62                          |
| 10342565              |               | 0.62                          |
| 10340126              |               | 0.62                          |
| 10343628              |               | 0.61                          |
| 10342656              |               | 0.61                          |
| 10549635              | Lilra5        | 0.61                          |
| 10598507              | Slc38a5       | 0.61                          |
| 10394054              | Cd7           | 0.60                          |
| 10339999              |               | 0.60                          |
| 10344401              |               | 0.60                          |
| 10455901              | Slc27a6       | 0.60                          |
| 10439744              | Cd96          | 0.59                          |
| 10341513              |               | 0.59                          |
| 10415017              |               | 0.59                          |
| 10388086              | Nlrp1c-ps     | 0.59                          |
| 10339256              |               | 0.58                          |
| 10338889              |               | 0.58                          |
| 10339303              |               | 0.58                          |
| 10542140              | Klrb1f        | 0.57                          |
| 10340591              |               | 0.57                          |
| 10490491              | Gata5         | 0.57                          |
| 10339213              |               | 0.57                          |
| 10338115              |               | 0.57                          |
| 10342848              |               | 0.57                          |
| 10340274              |               | 0.57                          |
| 10344564              |               | 0.57                          |
| 10342236              |               | 0.56                          |
| 10542181              | Clec9a        | 0.56                          |
| 10579894              | Hhip          | 0.55                          |
| 10404404              | Foxf2         | 0.55                          |
| 10604057              | Sept6         | 0.55                          |
| 10547894              | Cd4           | 0.55                          |
| 10339271              |               | 0.55                          |
| 10568202              | Sept1         | 0.55                          |
| 10340186              |               | 0.55                          |
| 10597273              | Rtp3          | 0.55                          |
| 10343185              |               | 0.55                          |
| 10338966              |               | 0.55                          |
| 10472235              | Dapl1         | 0.54                          |
| 10409567              | Tifab         | 0.54                          |
| 10496438              | Adh1          | 0.54                          |
| 10382228              | Axin2         | 0.54                          |
| 10371379              | Nuak1         | 0.54                          |
| 10406928              | Cd180         | 0.53                          |
| 10402560              | A130014H13Rik | 0.53                          |
| 10593024              | Cd3e          | 0.53                          |

| Transcript Cluster ID | Gene Symbol | Fold change, log <sub>2</sub> |
|-----------------------|-------------|-------------------------------|
| 10343717              |             | 0.52                          |
| 10500529              | Phgdh       | 0.52                          |
| 10368644              | Fam26f      | 0.51                          |
| 10341632              |             | 0.51                          |
| 10339232              |             | 0.51                          |
| 10339767              |             | 0.51                          |
| 10361215              | Traf3ip3    | 0.51                          |
| 10341573              |             | 0.51                          |
| 10343937              |             | 0.50                          |
| 10343082              |             | 0.50                          |
| 10563355              | Sec1        | -0.50                         |
| 10344439              |             | -0.50                         |
| 10341278              |             | -0.50                         |
| 10344032              |             | -0.50                         |
| 10339742              |             | -0.51                         |
| 10493548              | Pmvk        | -0.51                         |
| 10344446              |             | -0.51                         |
| 10588577              | Cish        | -0.51                         |
| 10467206              | Ppp1r3c     | -0.51                         |
| 10367440              | Itga7       | -0.52                         |
| 10534667              | Serpine1    | -0.52                         |
| 10519497              | Steap4      | -0.52                         |
| 10416230              | Tnfrsf10b   | -0.52                         |
| 10523048              | Npffr2      | -0.52                         |
| 10472136              | Galnt13     | -0.52                         |
| 10344216              |             | -0.52                         |
| 10607712              | Grpr        | -0.52                         |
| 10362138              | Vnn1        | -0.53                         |
| 10342877              |             | -0.53                         |
| 10439321              | Slc15a2     | -0.53                         |
| 10342437              |             | -0.53                         |
| 10542066              | Tspan11     | -0.53                         |
| 10433885              | Cebpd       | -0.53                         |
| 10369290              | Ddit4       | -0.53                         |
| 10400304              | Egln3       | -0.53                         |
| 10341075              |             | -0.53                         |
| 10531887              | Slc10a6     | -0.54                         |
| 10414192              | Mat1a       | -0.54                         |
| 10445875              | Btg3        | -0.54                         |
| 10343215              |             | -0.54                         |
| 10340855              |             | -0.54                         |
| 10503334              | Gem         | -0.54                         |
| 10343550              |             | -0.54                         |
| 10458382              | Cd14        | -0.55                         |
| 10454198              | Rnf125      | -0.55                         |
| 10403312              | Akr1c19     | -0.55                         |
| 10448117              | Has1        | -0.55                         |
| 10339543              |             | -0.55                         |
| 10342172              |             | -0.55                         |
| 10440419              | Btg3        | -0.55                         |
| 10376513              | Nlrp3       | -0.55                         |

| Transcript Cluster ID | Gene Symbol | Fold change, log <sub>2</sub> |
|-----------------------|-------------|-------------------------------|
| 10586614              | C2cd4b      | -0.56                         |
| 10583044              | Mmp13       | -0.56                         |
| 10437151              | Kcnj15      | -0.56                         |
| 10457585              |             | -0.56                         |
| 10510580              | Tnfrsf9     | -0.56                         |
| 10523175              | Ereg        | -0.56                         |
| 10404840              | Cd83        | -0.56                         |
| 10463737              | Ina         | -0.56                         |
| 10456296              | Malt1       | -0.56                         |
| 10339960              |             | -0.57                         |
| 10340381              |             | -0.57                         |
| 10431051              | Scube1      | -0.58                         |
| 10575074              | Tmco7       | -0.58                         |
| 10343662              |             | -0.58                         |
| 10338406              |             | -0.58                         |
| 10341011              |             | -0.59                         |
| 10339407              |             | -0.59                         |
| 10339552              |             | -0.59                         |
| 10420891              | Scara3      | -0.59                         |
| 10574213              | Ccl22       | -0.59                         |
| 10548735              | Dusp16      | -0.60                         |
| 10504838              | Nr4a3       | -0.60                         |
| 10476740              | Slc24a3     | -0.60                         |
| 10344080              |             | -0.60                         |
| 10351455              | Rgs5        | -0.60                         |
| 10342452              |             | -0.61                         |
| 10554819              | Me3         | -0.61                         |
| 10339806              |             | -0.61                         |
| 10521038              | Slc5a1      | -0.61                         |
| 10435704              | Cd80        | -0.61                         |
| 10362426              | Trdn        | -0.61                         |
| 10523134              | Pf4         | -0.62                         |
| 10375313              | Ccnjl       | -0.62                         |
| 10420114              | Tgm1        | -0.62                         |
| 10597758              | Csrnp1      | -0.63                         |
| 10576757              | Fcer2a      | -0.63                         |
| 10459602              | Ptpn2       | -0.63                         |
| 10338480              |             | -0.63                         |
| 10339042              |             | -0.64                         |
| 10608637              |             | -0.64                         |
| 10425283              | Maff        | -0.65                         |
| 10462442              | Il33        | -0.65                         |
| 10338793              |             | -0.66                         |
| 10339482              |             | -0.66                         |
| 10440522              | Adamts1     | -0.66                         |
| 10357155              | Inhbb       | -0.66                         |
| 10341523              |             | -0.66                         |
| 10575095              | Has3        | -0.67                         |
| 10487597              | Il1b        | -0.67                         |
| 10344523              |             | -0.67                         |
| 10505445              | Orm3        | -0.67                         |



| Transcript Cluster ID | Gene Symbol   | Fold change, log <sub>2</sub> |
|-----------------------|---------------|-------------------------------|
| 10523151              | Cxcl1         | -0.68                         |
| 10449741              | Sik1          | -0.68                         |
| 10422227              | Spry2         | -0.68                         |
| 10342529              |               | -0.69                         |
| 10343657              |               | -0.69                         |
| 10426368              | Lrrk2         | -0.69                         |
| 10351463              | Rgs5          | -0.69                         |
| 10436100              | Retnlg        | -0.70                         |
| 10520862              | Fosl2         | -0.70                         |
| 10362129              | Vnn3          | -0.71                         |
| 10343306              |               | -0.71                         |
| 10343497              |               | -0.73                         |
| 10340424              |               | -0.75                         |
| 10500710              | BC037703      | -0.76                         |
| 10402347              | lfi27l2a      | -0.77                         |
| 10386455              | Rasd1         | -0.79                         |
| 10492448              | Ptx3          | -0.79                         |
| 10340645              |               | -0.79                         |
| 10576386              | Rhou          | -0.80                         |
| 10487588              | Il1a          | -0.80                         |
| 10399854              | Slc26a4       | -0.80                         |
| 10547206              | Fxyd4         | -0.80                         |
| 10409278              | Nfil3         | -0.81                         |
| 10548118              | Prmt8         | -0.81                         |
| 10435712              | Cd80          | -0.82                         |
| 10536563              | Cftr          | -0.84                         |
| 10382321              | Kcnj2         | -0.84                         |
| 10513722              | Tnfsf15       | -0.84                         |
| 10377439              | Per1          | -0.86                         |
| 10341833              |               | -0.86                         |
| 10523672              |               | -0.88                         |
| 10520452              | Il6           | -0.91                         |
| 10379721              | Ccl4          | -0.94                         |
| 10542319              | Apold1        | -0.97                         |
| 10373912              | Osm           | -0.98                         |
| 10482772              | Nr4a2         | -1.00                         |
| 10552743              | Il4i1         | -1.02                         |
| 10408529              |               | -1.03                         |
| 10545212              | Gm5574        | -1.06                         |
| 10523182              | Areg          | -1.08                         |
| 10462132              | E030010A14Rik | -1.09                         |
| 10545202              | Gm1077        | -1.11                         |
| 10445746              | Trem1         | -1.13                         |
| 10574226              | Ccl17         | -1.32                         |
| 10459455              | Alpk2         | -1.34                         |
| 10523156              | Cxcl2         | -1.40                         |
| 10419568              | Ear11         | -1.43                         |
| 10545247              | Igk-V19-14    | -1.91                         |
